# Supplementary material for: Einheitliche Basisversorgung von Kindern und Jugendlichen mit Long COVID
Source: Springer Nature journal article supplement (doi:10.1007/s00112-021-01408-1), 2022-05-25
Supplement: MOESM1 [file 23081988]

**Online Supplement:****Tabelle 1: Erweiterte Labordiagnostik**

| <b>Erweiterte Labordiagnostik:</b>                                                              | <b>Erstvorstellung:</b><br>Frühestens 4-6 Wochen nach SARS-CoV-2-Infektion                                                                                                                                                                                                                                              | <b>Folgetermine</b><br>3, 6, 9, 12, 18, 24 Monate, falls noch symptomatisch |
|-------------------------------------------------------------------------------------------------|-------------------------------------------------------------------------------------------------------------------------------------------------------------------------------------------------------------------------------------------------------------------------------------------------------------------------|-----------------------------------------------------------------------------|
| <i>Bei gezielter kardiologischer Fragestellung</i>                                              | <i>u.a. CK, Troponin I/T, NT-proBNP, D-Dimere (siehe PIMS)</i>                                                                                                                                                                                                                                                          | Nach klinischer Indikation und Vorbefunden                                  |
| <i>Bei gezielter gastroenterologischer Fragestellung</i>                                        | <i>u.a. ASAT (GOT), GGT, Harnstoff, Gesamteiweiß, Albumin, Lipase, Alkalische Phosphatase, ggf. Calprotectin im Stuhl, Blut im Stuhl, ggf. anti-Transglutaminase oder anti-Endomysium IgA mit Bestimmung von Gesamt IgA</i>                                                                                             | Nach klinischer Indikation und Vorbefunden                                  |
| <i>Bei erhöhtem Risiko für thrombotische Ereignisse u./o. Antikoagulation</i>                   | <i>u. a. INR, PTT, D-Dimere, Fibrinogen, Protein S und C, Antiphospholipid Ak, Konsil Hämostaseologie</i>                                                                                                                                                                                                               | Nach klinischer Indikation und Vorbefunden                                  |
| <i>Bei Fatigue, PEM u./o. neurologischen Symptomen</i>                                          | <i>u.a. venöse BGA, Laktat, Glukose Natrium, Kalium, Chlorid, Calcium, Phosphat, Magnesium, ACTH, Cortisol basal, TSH, ft4, ggf. Vitamin B12, B6, B1, Folsäure, Zink, Vitamin D3, Ausschluss Sjögren (IgG, anti-Ro, anti-LA, ANA, IgM Rheumafaktor) oder andere rheumatologische Erkrankung (s.u.)<br/>Liquorstatus</i> | Nach klinischer Indikation und Vorbefunden                                  |
| <i>Bei Hautveränderungen und gezielter rheumatologischer Fragestellung bzw. V.a. Vaskulitis</i> | <i>u.a. ENAs, ANCA, Antiphospholipid-Antikörper, Lupus-Antikoagulans (siehe PIMS), U1-RNP-Antikörper, anti-Ro AK anti-LA, ggf. auch weitere Autoantikörper durch Rheumatologie</i>                                                                                                                                      | Nach klinischer Indikation und Vorbefunden                                  |

**Online Supplement:****Tabelle 2: Bildgebende Diagnostik**

| <b>Bildgebende Diagnostik</b>                                                | <b>Erstvorstellung:</b><br>Frühestens 4-6 Wochen nach SARS-CoV-2-Infektion                                                                                   | <b>Folgetermine</b><br>3, 6, 9, 12, 18, 24 Monate, falls noch symptomatisch                                             |
|------------------------------------------------------------------------------|--------------------------------------------------------------------------------------------------------------------------------------------------------------|-------------------------------------------------------------------------------------------------------------------------|
| <b>Bei allen Patient*innen</b>                                               | Nach klinischer Indikation                                                                                                                                   | Nach klinischer Indikation                                                                                              |
| <i>Bei gezielter rheumatologischer oder infektiologischer Fragestellung</i>  | EKG, wenn auffällig<br>Echokardiographie,<br>Abdomen-Sonogramm,<br>Röntgen-Thorax, ggf.<br>Gelenksonografie                                                  | Nach klinischer Indikation                                                                                              |
| <i>Bei gezielter kardiologischer Fragestellung</i>                           | EKG, Echokardiographie, ggf.<br>Kardio- MRT                                                                                                                  | EKG, Echokardiographie                                                                                                  |
| <i>Bei gezielter pulmonologischer Fragestellung</i>                          | Röntgen-Thorax, Lungen-Sonogramm, ggf. <i>low dose</i> CT- Thorax ohne Kontrastmittel (z. A. <i>pulmonale Infiltrate, Belüftungsstörungen</i> )              | Nach klinischer Indikation und Vorbefunden: Lungen-Sonogramm/ Röntgen-Thorax, ggf. <i>low dose</i> CT-Thorax, MRT-Lunge |
| <i>Bei gezielter gastroenterologischer Fragestellung</i>                     | Abdomen-Sonogramm (Fokussuche: Raumforderung/ Entzündlicher Prozess)                                                                                         | Abdomen-Sonogramm, ggf. Gastro-/Koloskopie                                                                              |
| <i>Bei gezielter neurologischer Fragestellung (inkl. HNO/Ophthalmologie)</i> | MRT Schädel/spinal bei neuropädiatrischer Indikation (z.B. fokale neurologische Symptome, bzw. Verschlechterung oder Neuhinzutreten neurologischer Symptome) | Nach klinischer Indikation                                                                                              |

**Online Supplement:****Tabelle 3: Funktionsdiagnostik**

| <b>Funktionsdiagnostik</b>                                                          | <b>Erstvorstellung</b>                                                                                                                                                                                                                                                                                                                                               | <b>Folgetermine</b>                                                                                                                                       |
|-------------------------------------------------------------------------------------|----------------------------------------------------------------------------------------------------------------------------------------------------------------------------------------------------------------------------------------------------------------------------------------------------------------------------------------------------------------------|-----------------------------------------------------------------------------------------------------------------------------------------------------------|
|                                                                                     | Frühestens 4-6 Wochen nach SARS-CoV-2-Infektion                                                                                                                                                                                                                                                                                                                      | 3, 6, 9, 12, 18, 24 Monate, falls noch symptomatisch                                                                                                      |
| Bei allen Patient*innen                                                             | Standard: Blutdruck, SpO <sub>2</sub> , EKG, Orthostase-Test (10-min-Stehtest, Kipptisch) z.A. autonome Dysregulation, Spirometrie und SpO <sub>2</sub> nach freiem Laufen, Belastungstest (6 min Gehstest, 1 min <i>Sit-to-stand</i> -Test), Neurostatus (SOP im Anhang), Screening kognitiver Funktionen und psychischer Probleme (KOPKI bzw. KOPKIJ und CBCL/YSR) | Nach klinischer Indikation organspezifische Abklärung und ggf. neuropsychologische Diagnostik                                                             |
| <b>Zusätzlich bei kardialer Symptomatik</b>                                         | Ruhe-12-Kanal-EKG und Rhythmusstreifen, ggfs 24h-Langzeit-EKG/-RR, Belastungs-EKG, Spezialdiagnostik: Verfahren zur Beurteilung von Herzfrequenzvariabilität und endothelialer Dysfunktion                                                                                                                                                                           | Nach klinischer Indikation, insbesondere: 24h-Langzeit-EKG, Belastungs-EKG                                                                                |
| <b>Zusätzlich bei pulmonaler Symptomatik</b>                                        | s.o., Bodyplethysmographie, wenn verfügbar Laufbandbelastung mit Broncholyse und BGA                                                                                                                                                                                                                                                                                 | Nach klinischer Indikation, insbesondere: CO-Diffusion, LCI, Spiroergometrie mit BGA                                                                      |
| <b>Zusätzlich bei neurologischer Symptomatik (inkl. HNO/Ophthalmologie)</b>         | s.o., EEG, ggf. standardisierter Riechtest (z.B. U-Sniff), ggf. quantitative sensorische Testung (QST, z.B. als <i>bedside</i> -Test)                                                                                                                                                                                                                                | Nach klinischer Indikation, insbesondere: NLG bei peripherer neurol. Störung, Testung Schwindel (HNO), Visusprüfung (Augenarzt)                           |
| <b>Zusätzlich bei <i>Fatigue</i><sup>*</sup> / Post-exertioneller Malaise (PEM)</b> | MBSQ, PedsQL MFS, DSQ-PEM-Score, PHQ4, Ausschluss psych. Differentialdiagnosen (wie Depression, Angststörung)                                                                                                                                                                                                                                                        | Nach klinischer Indikation, insbesondere Wiederholung PedsQL MFS, DSQ-PEM-Score, Erweiterung nach klinischer Indikation, ggf. psychologische Mitbetreuung |
| <b>Zusätzlich bei Lernproblemen und/oder psychischen Auffälligkeiten</b>            | Neuropsychologische Diagnostik                                                                                                                                                                                                                                                                                                                                       | Monitoring der Lern- und psychischen Störungen                                                                                                            |
